# Supplementary material
Source: PubMed Central journal article supplement (PMC3538482)
Supplement: mmc2.pdf [file mmc2.pdf]

**eTable 1.-Sensitivity, specificity and prevalence of each study. PCR=Polymerase Chain Reaction**

| Study, year                              | Reference Standard                                          | PCR Test Used                        | Prevalence | N=               | Sensitivity | Specificity |
|------------------------------------------|-------------------------------------------------------------|--------------------------------------|------------|------------------|-------------|-------------|
| Arzese et al., 1995 <sup>14</sup>        | Toxigenic culture                                           | Kato et al sequence <sup>22</sup>    | 0.37       | 89               | 1.00        | 0.97        |
|                                          | Cytotoxin Assay                                             | Kato et al sequence <sup>22</sup>    | 0.37       | 89               | 1.00        | 0.88        |
| Alonso et al., 1999 <sup>13</sup>        | Cytotoxin assay                                             | In house sequence                    | 0.27       | 96               | 0.96        | 1.00        |
| Guilbault et al., 2002 <sup>19</sup>     | Cytotoxin assay                                             | Alonso et al. sequence <sup>13</sup> | 0.50       | 118              | 0.92        | 1.00        |
| Bélanger et al., 2003 <sup>17</sup>      | Cytotoxin assay                                             | Does not report                      | 0.52       | 56               | 0.97        | 1.00        |
| Zheng et al, 2004 <sup>33</sup>          | Toxigenic culture                                           | In house sequence                    | 0.15       | 992              | 0.93        | 0.90        |
| van den Burg et al., 2005 <sup>31</sup>  | Cytotoxin assay                                             | Does not report                      | 0.06       | 367              | 0.87        | 0.96        |
| Peterson et al., 2007 <sup>23</sup>      | Cytotoxin assay                                             | In house sequence                    | 0.14       | 228              | 0.89        | 1.00        |
|                                          | Toxigenic culture                                           | In house sequence                    | 0.16       | 228              | 0.84        | 1.00        |
| van den Burg et al., 2007 <sup>32</sup>  | Cytotoxin assay                                             | Does not report                      | 0.06       | 540              | 0.87        | 0.96        |
| Sloan et al., 2008 <sup>27</sup>         | Toxigenic culture                                           | LightCycler®                         | 0.22       | 200              | 0.86        | 0.97        |
| Barbut et al., 2009 <sup>15</sup>        | Cytotoxin assay                                             | BD Gene Ohm®                         | 0.13       | 300              | 0.96        | 0.95        |
|                                          | Toxigenic culture                                           | BD Gene Ohm®                         | 0.12       | 300              | 0.94        | 0.98        |
| Eastwood et al., 2009 <sup>18</sup>      | Cytotoxin assay                                             | BD Gene Ohm®                         | 0.19       | 558              | 0.79        | 0.98        |
|                                          | Toxigenic culture                                           | BD Gene Ohm®                         | 0.19       | 558              | 0.85        | 0.98        |
| Huang et al., 2009 <sup>20</sup>         | Cytotoxin assay                                             | Cepheid Xpert®                       | 0.21       | 220              | 0.72        | 0.99        |
| Stamper et al., 2009 <sup>28</sup>       | Toxigenic culture                                           | BD Gene Ohm®                         | 0.15       | 401              | 0.84        | 0.98        |
|                                          | Cytotoxin assay                                             | BD Gene Ohm®                         | 0.14       | 401              | 0.70        | 0.99        |
| Stamper et al., 2009 <sup>29</sup>       | Toxigenic culture                                           | ProGastro®                           | 0.15       | 285 (5 not used) | 0.77        | 0.99        |
| Terhes et al., 2009 <sup>30</sup>        | Cytotoxin assay                                             | BD Gene Ohm®                         | 0.09       | 600              | 0.96        | 0.99        |
| de Boer et al, 2010 <sup>55</sup>        | Cytotoxin assay                                             | Applied Biosystems®                  | 0.10       | 161              | 1.00        | 0.94        |
| Kvach et al., 2010 <sup>24</sup>         | Toxigenic culture                                           | BD Gene Ohm®                         | 0.26       | 400              | 0.91        | 1.00        |
| Novak-Weekley et al., 2010 <sup>25</sup> | Cytotoxin assay                                             | Cepheid Xpert®                       | 0.19       | 428              | 0.94        | 0.96        |
| Tenover et al, 2010 <sup>54</sup>        | Toxigenic culture                                           | Cepheid Xpert®                       | 0.19       | 2,296            | 0.99        | 0.91        |
| Barbut et al, 2011 <sup>16</sup>         | Toxigenic culture                                           | In house PCR                         | 0.10       | 860              | 0.87        | 0.97        |
| Karre et al., 2011 <sup>21</sup>         | 3 positive tests by different PCRs and/or toxigenic culture | LightCycler®                         | 0.10       | 346              | 0.94        | 1.00        |
|                                          | 3 positive tests by different PCRs and/or toxigenic culture | BD Gene Ohm®                         | 0.10       | 346              | 0.84        | 0.99        |
|                                          | 3 positive tests by different PCRs and/or toxigenic culture | ProGastro®                           | 0.11       | 346              | 0.92        | 0.99        |
| Knetsch et al, 2011 <sup>23</sup>        | Toxigenic culture                                           | LUMC®                                | 0.28       | 526              | 0.96        | 0.88        |
|                                          | Toxigenic culture                                           | LvI®                                 | 0.27       | 522              | 1           | 0.89        |
|                                          | Toxigenic culture                                           | Δ117®                                | 0.26       | 522              | 0.98        | 0.91        |
|                                          | Toxigenic culture                                           | BD Gene Ohm®                         | 0.19       | 512              | 0.88        | 0.97        |
| Selvaraju et al, 2011 <sup>56</sup>      | Toxigenic culture                                           | BD Gene Ohm®                         | 0.24       | 200              | 0.89        | 0.97        |
| Selvaraju et al, 2011 <sup>56</sup>      | Toxigenic culture                                           | ProGastro®                           | 0.24       | 1                | 1           | 0.93        |
| Zidaric et al., 2011 <sup>34</sup>       | Toxigenic culture                                           | BD Gene Ohm®                         | 0.13       | 194              | 0.82        | 0.98        |
|                                          | Toxigenic culture                                           | Cepheid Xpert®                       | 0.17       | 178              | 0.96        | 0.97        |
| Kim et al, 2012 <sup>53</sup>            | Toxigenic Culture                                           | AdvanSure RT-PCR                     | 0.09       | 127              | 1           | 0.98        |
