# Supplementary material
Source: PubMed Central journal article supplement (PMC3538482)
Supplement: mmc3.pdf [file mmc3.pdf]

**eTable 2.-** Subgroup analysis by different brands of commercial PCR.

| <b>PCR Brand</b>                                             | <b>Sensitivity (95% CI)</b> | <b>I<sup>2</sup></b> | <b>Specificity (95% CI)</b> | <b>I<sup>2</sup></b> |
|--------------------------------------------------------------|-----------------------------|----------------------|-----------------------------|----------------------|
| BD Gene Ohm®<br>(Toxigenic Culture<br>reference Standard)    | 0.91 (0.89-0.93)            | 80.3%                | 0.94 (0.94-0.95)            | 94.1%                |
| Prograstro®<br>(Toxigenic Culture<br>reference Standard)     | 0.90 (0.83-0.95)            | 87.7%                | 0.98 (0.97-0.99)            | 88.2%                |
| LightCycler®<br>(Toxigenic Culture<br>reference standard)    | 0.887 (0.79-0.95)           | 0%                   | 0.989 (0.975-0.996)         | 78.3%                |
| BD Gene Ohm ®<br>(Cytotoxicity assay<br>reference standard)  | 0.826 (0.773-0.872)         | 85.4%                | 0.981 (0.974-0.987)         | 80.4%                |
| Cepheid Xpert®<br>(Cytotoxicity assay<br>reference standard) | 0.857 (0.781-0.915)         | 91.1%                | 0.974 (0.956-0.985)         | 81.6%                |
