# Supplementary material
Source: PubMed Central journal article supplement (PMC3538482)
Supplement: mmc4.pdf [file mmc4.pdf]

**eAppendix.** Databases searched in strategy.

PubMed

CinAHL

Panetelemion

IndMed

KoreaMed

EMRO

IMSEAR

LILACS

Western Pacific Index Medicus

African Index Medicus

IBECS
