# Supplementary material
Source: PubMed Central journal article supplement (PMC3538482)

**eFigure.** PRISMA search strategy.  
PCR=Polymerase Chain Reaction

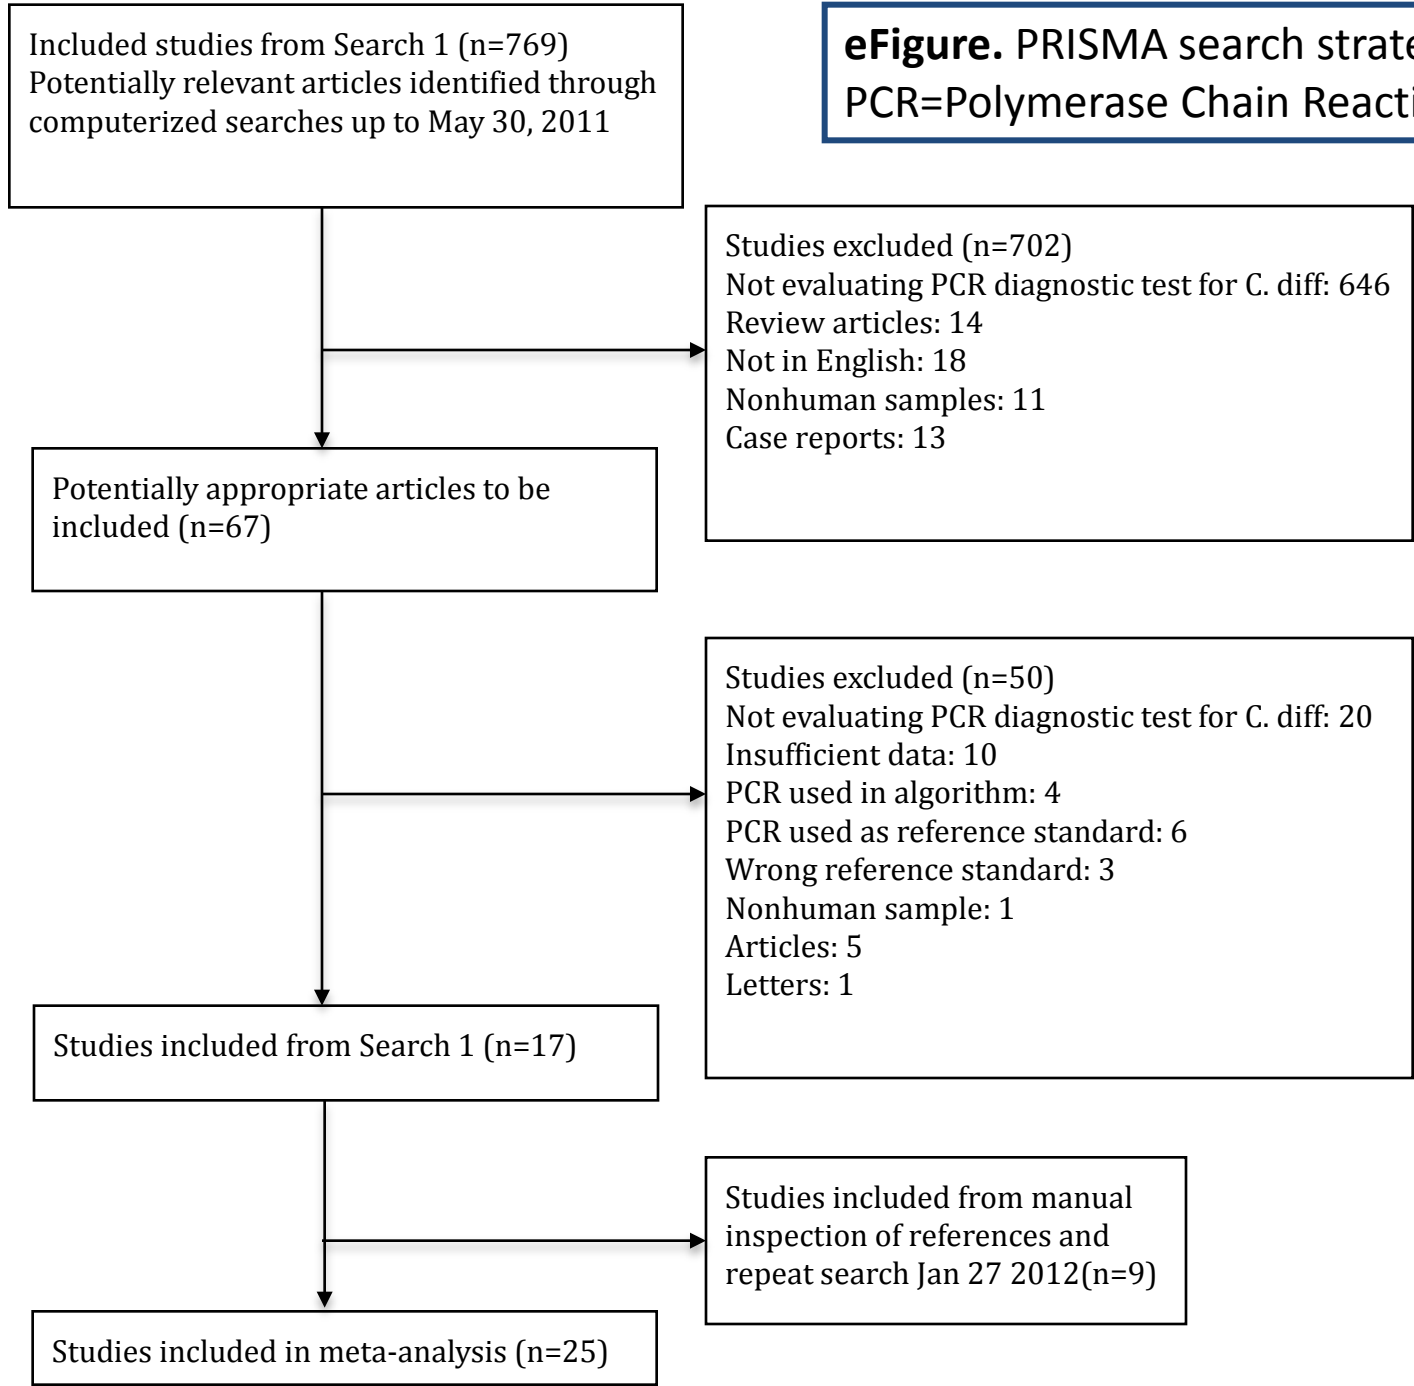

Supplement: mmc1.pdf [file mmc1.pdf]
